# Supplementary material
Source: PubMed Central journal article supplement (PMC3763975)
Supplement: supp_jc.2013-2148_JC-13-2148_1Tab.pdf [file supp_jc.2013-2148_JC-13-2148_1Tab.pdf]

**Supplemental Table 1: Mean cortisol and change in mean cortisol by subgroups**

|             | Timepoint |       |       |        |        |
|-------------|-----------|-------|-------|--------|--------|
|             | 1         | 2     | 3     | 4      | 5      |
| Age < 2     |           |       |       |        |        |
| Mean        | 3.840     | 5.173 | 4.989 | 2.912  | 5.826  |
| Mean change |           | 1.181 | .998  | -1.079 | 1.781  |
| Age >= 2    |           |       |       |        |        |
| Mean        | 4.624     | 5.595 | 6.040 | 5.171  | 5.577  |
| Mean change |           | .971  | 1.417 | 1.087  | .953   |
| p value     | 0.4       | 0.15  | 0.68  | 0.14   | 0.90   |
| 7-10am      |           |       |       |        |        |
| Mean        | 4.484     | 5.347 | 5.484 | 3.552  | 6.053  |
| Mean change |           | .862  | 1.000 | -.933  | 1.569  |
| 10-1pm      |           |       |       |        |        |
| Mean        | 3.322     | 4.657 | 4.943 | 4.437  | 5.588  |
| Mean change |           | 1.210 | 1.500 | .990   | 2.083  |
| 1-4 pm      |           |       |       |        |        |
| Mean        | 7.509     | 8.851 | 8.128 | 6.297  | 4.862  |
| Mean change |           | 1.342 | .619  | -1.212 | -2.647 |
| P value     | 0.4       | 0.99  | 0.48  | 0.5    | 0.51   |
| Caudal      |           |       |       |        |        |
| Mean        | 3.883     | 5.083 | 5.027 | 3.766  | 5.563  |
| Mean change |           | 1.078 | 1.022 | -.239  | 1.516  |
| Non-Caudal  |           |       |       |        |        |
| Mean        | 4.852     | 5.934 | 6.389 | 5.209  | 5.977  |
| Mean change |           | 1.082 | 1.537 | .357   | 1.126  |
| p value     | 0.49      | 0.34  | 0.25  | 0.36   | 0.15   |
| Minimal     |           |       |       |        |        |
| Mean        | 4.468     | 5.605 | 5.558 | 3.997  | 5.476  |
| Mean change |           | 1.022 | .974  | -.586  | .860   |
| Moderate    |           |       |       |        |        |
| Mean        | 2.50      | 3.944 | 5.112 | 5.924  | 7.138  |
| Mean change |           | 1.443 | 2.611 | 3.424  | 4.637  |
| P value     | 0.31      | 0.47  | 0.13  | 0.02   | 0.01   |

Signed rank test was used to compare the mean change in cortisol by subgroup for each timepoint with corresponding p value.
